# Supplementary material
Source: PubMed Central journal article supplement (PMC5491787)

## Fungal Sirtuin E is a Global Transcription Regulator That Determines Transition Between Exponential Growth and Stationary Phases

Eriko Itoh, Rika Odakura, Ken-Ichi Oinuma, Motoyuki Shimizu, Shunsuke Masuo, and Naoki Takaya

Faculty of Life and Environmental Sciences, University of Tsukuba, Tsukuba, Ibaraki 305-8572, Japan.

### Supplementary Figure Legends

**FIGURE S1.** Sirtuins of *A. nidulans*.

*A*, Phylogenetic tree of sirtuins of *A. nidulans* and human. *B*, Structures of *A. nidulans* sirtuin isozymes. The conserved sirtuin core domains (black) and NLS (gray) are shown. *C*, Amino acid sequence alignment of the *A. nidulans* sirtuins isozymes.

**FIGURE S2.** Gene disruption of *A. nidulans sirE*.

Strategy for disruption of *sirE* gene (*left*) and Southern blot of total DNA of WT and SirEΔ strains digested with *XhoI* (*right*). Bars indicate positions and sizes of hybridization probes.

**FIGURE S3.** Activity for extracellular hydrolases in *A. nidulans* culture supernatant.

The *A. nidulans* A26 (WT) (●) and SirEΔ (■) were cultured in liquid GMM medium at 30°C, and hydrolase activities in the fungal culture supernatants were determined. The activities of β-cellobiase, β-xylosidase, α-glucosidase, β-glucosidase, β-galactosidase, and β-mannosidase were measured. Data are the mean ± the standard errors for three experiments. \*, *P* < 0.05 versus WT.

**FIGURE S4.** Chromatin immunoprecipitation of the *pfkA*, *gpdA*, and *agsB* genes.

Chromatin immunoprecipitation analyses measured acetylation levels on the gene promoters of *pfkA*, *gpdA*, and *agsB* in *A. nidulans* A26 (WT) (black bars) and SirEΔ (white bars) cultured in GMM medium. Anti-H3K18ac antibody precipitated DNA and the relative amounts were presented to that precipitated by anti-histone H3 antibody. Negative controls without the acetyllysine antibodies were < 0.01. Left panels present levels of transcripts of the indicated genes. Data are means ± standard errors for three experiments. \*, *P* < 0.05, and \*\*, *P* < 0.07 versus WT.

**Supplementary Table S1** Primers used in this study.

| primer                                           | Nucleotide sequence                                        | used to generate                    |
|--------------------------------------------------|------------------------------------------------------------|-------------------------------------|
| <i>Cassette for gene disruption</i>              |                                                            |                                     |
| SirE-5 F                                         | 5'-ATCAGTCCCAGGACAACAGG-3'                                 | 5'-region of <i>sirE</i>            |
| SirE-5-argB R                                    | 5'-AAAACCGCGAAATAAAGCTTGGGATGACGCGAGAGTAGAG-3'             |                                     |
| SirE-3-argB F                                    | 5'-CGCAATGGCTGTAGGTCGACTAGATATGCCGTTGGCGTTT-3'             | 3'-region of <i>sirE</i>            |
| SirE-3-R                                         | 5'-TCCATTACCTGCGACTAGC-3'                                  |                                     |
| argB-F                                           | 5'-AAGCTTATTTCCGCGTTTT-3'                                  | <i>argB</i>                         |
| argB-R                                           | 5'-GTCGACCTACAGCCATTGCG-3'                                 |                                     |
| SirE-5-F2                                        | 5'-GAGCGACTGAGGCTAACAG-3'                                  | disruptant cassette for <i>sirE</i> |
| SirE-3-R2                                        | 5'-CTGAATTCGAGGGTTCAG-3'                                   |                                     |
| <i>Plasmids for GFP-fused protein production</i> |                                                            |                                     |
| GAP F xba1                                       | 5'-GCTCTAGAAAAAGTCACACAACACAAGC-3'                         | <i>gdpA</i> promoter                |
| GAP R                                            | 5'-CCATTGTGATGTCTGCTCAA-3'                                 |                                     |
| GAP SirE F                                       | 5'-TTGAGCAGACATCACAATGGATGGCACCTCGCAAAACCAA-3'             | <i>sirE</i>                         |
| SirE linker R                                    | 5'-GGCACCGGCTCCAGCGCCTGCACCAGCTCCATCAAGCAACTTGCCCATTC-3'   |                                     |
| GAP SirA F                                       | 5'-CCGCTTGAGCAGACATCACAATGGACCTTGCTTCAGCGCC-3'             | <i>sirA</i>                         |
| SirA linker R                                    | 5'-GGCACCGGCTCCAGCGCCTGCACCAGCTCCTCCGCTAACCTTGAATACAT-3'   |                                     |
| linker GFP F                                     | 5'-GGAGCTGGTGCAGGCGCTGGAGCCGGTGCCATGGTGTGAGCAAGGGCGAGGA-3' | <i>gfp</i>                          |
| GFP sac2 R                                       | 5'-GTGCCCGCGTTACTTGTACAGCTCGTCCA-3'                        |                                     |
| GFP not1 R                                       | 5'-CGCGCGGGCGGCCGCTTACTTGTACAGCTCGTCCA-3'                  |                                     |
| <i>Quantitative PCR</i>                          |                                                            |                                     |
| agsB RT F                                        | 5'-CTTATCTGGGTGGTGCCT TG-3'                                | <i>agsB</i>                         |
| agsB RT R                                        | 5'-CTGCACGTTACCTGGTA TG-3'                                 |                                     |
| agsA RT F                                        | 5'-GTATGAACCCAGACGGGAAG-3'                                 | <i>agsA</i>                         |
| agsA RT R                                        | 5'-AGGGTGTTACAGGGAGGATG-3'                                 |                                     |
| fksA RT F                                        | 5'-GCGGGACCTTCAATTTACAC-3'                                 | <i>fksA</i>                         |
| fksA RT R                                        | 5'-GCGAGAAGAGAGACCCAGAA-3'                                 |                                     |
| chsA RT F                                        | 5'-GGACGAAACCCACTTTACGA-3'                                 | <i>chsA</i>                         |
| chsA RT R                                        | 5'-CTTTGCCCCATGTACGAGAC-3'                                 |                                     |
| chsB RT F                                        | 5'-CCCGAGGAGAAGGAAGAGAA-3'                                 | <i>chsB</i>                         |
| chsB RT R                                        | 5'-ATGCAGACAGCGAGAAGACC-3'                                 |                                     |
| chsC RT F                                        | 5'-GTGGAGGTGCTTGTGGTGAG-3'                                 | <i>chsC</i>                         |
| chsC RT R                                        | 5'-CCAGGATGTTGCTGAGCTTG-3'                                 |                                     |
| chiB RT F                                        | 5'-TACAGGAGATGACGCCGTAC-3'                                 | <i>chiB</i>                         |
| chiB RT R                                        | 5'-GGTTACAGCTTGGACAGTG-3'                                  |                                     |
| engA RT F                                        | 5'-AGGGTGTTACAGGGAGGATG-3'                                 | <i>engA</i>                         |
| engA RT R                                        | 5'-CTACATGGTGAGGCAGAGCA-3'                                 |                                     |
| nagA RT F                                        | 5'-TTCCCAACTTCAACCCATC-3'                                  | <i>nagA</i>                         |
| nagA RT R                                        | 5'-GCGTCCCAATCTCCACATC-3'                                  |                                     |
| fluG RT F                                        | 5'-TACCTGCGGCTTTGAGATTG-3'                                 | <i>fluG</i>                         |
| fluG RT R                                        | 5'-CCAGGAATGGTTGGTCACAG-3'                                 |                                     |
| flbA RT F                                        | 5'-GTCGCTGTTCCCTTCGTCTTC-3'                                | <i>flbA</i>                         |
| flbA RT R                                        | 5'-AAAACCTGGGTGTGGTTGTGG-3'                                |                                     |
| brlA RT F                                        | 5'-CGAACTCCTGGTTCTGCT TC-3'                                | <i>brlA</i>                         |
| brlA RT R                                        | 5'-TTCCTGCCCTTCCATGCTAC-3'                                 |                                     |
| actA RT F                                        | 5'-GAAGTCTACGAACTGCCTGATG-3'                               | <i>actA</i>                         |
| actA RT R                                        | 5'-AAGAACGCTGGGCTGGAA-3'                                   |                                     |
| <i>ChIP assay</i>                                |                                                            |                                     |
| pfkA ChIP F                                      | 5'- TTGAGCAGTAATTCGTGTGTG -3'                              | <i>pfkA</i> promoter                |
| pfkA ChIP R                                      | 5'- GAAGCAGTGACGAAAAGAGTGA -3'                             |                                     |
| pkiA ChIP F                                      | 5'- TTGCTGGACGATTTATCAGG -3'                               | <i>pkiA</i> promoter                |
| pkiA ChIP R                                      | 5'- TCGGTTGTTGCTTATCTGTTG -3'                              |                                     |
| gpdA ChIP F                                      | 5'- TTGCTTCCGATCTGGTAAAAG -3'                              | <i>gpdA</i> promoter                |
| gpdA ChIP R                                      | 5'- GGAGAGGCACGATATTGGA -3'                                |                                     |
| agsB ChIP F                                      | 5'-CATCAACGACTCACCGACAC-3'                                 | <i>agsB</i> promoter                |
| agsB ChIP R                                      | 5'-CCGATAGACGAGACAAGACGA-3'                                |                                     |

Sirtuin at transition of exponential to stationary growth

---

|             |                               |                      |
|-------------|-------------------------------|----------------------|
| chiB ChIP F | 5'- AGCGCTGAGTAAGCAACTTC -3'  | <i>chiB</i> promoter |
| chiB ChIP R | 5'- AACTGTACCTGAGACGCTGTG -3' |                      |
| pkiA ORF F  | 5'-GTAGACTTGCCCGCTCTTTC-3'    | <i>pkiA</i> -ORF     |
| pkiA ORF R  | 5'-CTCTTCACCCAACACCTCAC -3'   |                      |

---

Supplementary Table S1 (continued)

Sirtuin at transition of exponential to stationary growth

**Supplementary Table S2** Summary of mRNA sequencing experiments.

| Experiment | Sample        | Total reads | Total bases |
|------------|---------------|-------------|-------------|
| 1          | WT            | 7,449,337   | 365,017,513 |
| 1          | SirE $\Delta$ | 7,445,910   | 364,849,590 |
| 2          | WT            | 7,450,921   | 365,095,129 |
| 2          | SirE $\Delta$ | 7,448,668   | 364,984,732 |

**Supplementary Table S3** Alignment statistics of reads aligned to the reference genome and the genes.

| Sample  | Total mapped reads (%) | Perfect match (%) | Mismatch (%) | Unique match (%) | Multi-position match (%) | Total unmapped reads (%) |
|---------|------------------------|-------------------|--------------|------------------|--------------------------|--------------------------|
| Genome  |                        |                   |              |                  |                          |                          |
| WT-1    | 91.76                  | 85.08             | 6.68         | 91.32            | 0.44                     | 8.24                     |
| SirEΔ-1 | 90                     | 83.57             | 6.43         | 89.55            | 0.45                     | 10                       |
| WT-2    | 89.89                  | 79.39             | 10.5         | 89.35            | 0.54                     | 10.11                    |
| SirEΔ-2 | 88.49                  | 80.03             | 8.46         | 87.99            | 0.5                      | 11.51                    |
| Gene    |                        |                   |              |                  |                          |                          |
| WT-1    | 64.86                  | 60.39             | 4.46         | 64.66            | 0.2                      | 35.14                    |
| SirEΔ-1 | 68.58                  | 64.13             | 4.45         | 68.34            | 0.24                     | 31.42                    |
| WT-2    | 61.54                  | 54.76             | 6.78         | 61.28            | 0.26                     | 38.46                    |
| SirEΔ-2 | 62.14                  | 56.5              | 5.64         | 61.9             | 0.24                     | 37.86                    |

**Supplementary Table S6** Gene Ontology terms enriched in regulated genes in SirEΔ.Genes of log<sub>2</sub> ratio ≤ -3 or ≥3, Probability ≥ 0.8, and *P* < 0.01 were selected.

| GO ID                                                   | GO term                                                                                               | Cluster frequency (%) | <i>P</i> value |
|---------------------------------------------------------|-------------------------------------------------------------------------------------------------------|-----------------------|----------------|
| <b><i>Down-regulated genes in SirEΔ (381 genes)</i></b> |                                                                                                       |                       |                |
| <i>Biological process</i>                               |                                                                                                       |                       |                |
| 45460                                                   | sterigmatocystin metabolic process                                                                    | 4.0                   | 2.38E-09       |
| 9404                                                    | toxin metabolic process                                                                               | 4.3                   | 7.95E-09       |
| 45461                                                   | sterigmatocystin biosynthetic process                                                                 | 3.7                   | 7.96E-09       |
| 1901376                                                 | organic heteropentacyclic compound metabolic process                                                  | 4.3                   | 3.53E-08       |
| 9403                                                    | toxin biosynthetic process                                                                            | 4.0                   | 3.91E-08       |
| 19748                                                   | secondary metabolic process                                                                           | 9.1                   | 8.62E-08       |
| 1901378                                                 | organic heteropentacyclic compound biosynthetic process                                               | 4.0                   | 1.29E-07       |
| 44550                                                   | secondary metabolite biosynthetic process                                                             | 7.2                   | 1.03E-06       |
| 42438                                                   | melanin biosynthetic process                                                                          | 1.6                   | 0.0006         |
| 44710                                                   | single-organism metabolic process                                                                     | 27.8                  | 0.00077        |
| 6582                                                    | melanin metabolic process                                                                             | 1.6                   | 0.00185        |
| 5975                                                    | carbohydrate metabolic process                                                                        | 9.9                   | 0.00581        |
| 42243                                                   | asexual spore wall assembly                                                                           | 1.1                   | 0.00975        |
| <i>Molecular function</i>                               |                                                                                                       |                       |                |
| 16705                                                   | oxidoreductase activity, acting on paired donors, with incorporation or reduction of molecular oxygen | 5.1                   | 0.00261        |
| 52689                                                   | carboxylic ester hydrolase activity                                                                   | 2.4                   | 0.00773        |
| 20037                                                   | heme binding                                                                                          | 4.5                   | 0.00811        |
| 46906                                                   | tetrapyrrole binding                                                                                  | 4.5                   | 0.00811        |
| <i>Cellular component</i>                               |                                                                                                       |                       |                |
| 5576                                                    | extracellular region                                                                                  | 8.3                   | 5.70E-08       |
| <b><i>Up-regulated genes in SirEΔ (300 genes)</i></b>   |                                                                                                       |                       |                |
| <i>Biological process</i>                               |                                                                                                       |                       |                |
| 44710                                                   | single-organism metabolic process                                                                     | 37.5                  | 5.83E-13       |
| 44281                                                   | small molecule metabolic process                                                                      | 22.9                  | 1.92E-11       |
| 44711                                                   | single-organism biosynthetic process                                                                  | 19.5                  | 1.68E-10       |
| 44283                                                   | small molecule biosynthetic process                                                                   | 13.0                  | 4.06E-10       |
| 46394                                                   | carboxylic acid biosynthetic process                                                                  | 8.2                   | 5.06E-10       |
| 16053                                                   | organic acid biosynthetic process                                                                     | 10.2                  | 2.17E-09       |
| 6082                                                    | organic acid metabolic process                                                                        | 15.4                  | 7.48E-09       |
| 43436                                                   | oxoacid metabolic process                                                                             | 13.0                  | 2.36E-08       |
| 55114                                                   | oxidation-reduction process                                                                           | 19.1                  | 6.77E-08       |
| 19752                                                   | carboxylic acid metabolic process                                                                     | 12.3                  | 1.54E-07       |
| 6633                                                    | fatty acid biosynthetic process                                                                       | 3.8                   | 1.28E-05       |
| 72330                                                   | monocarboxylic acid biosynthetic process                                                              | 4.1                   | 3.08E-05       |
| 44699                                                   | single-organism process                                                                               | 42.3                  | 0.00011        |
| 1901605                                                 | alpha-amino acid metabolic process                                                                    | 5.8                   | 0.00026        |
| 1901607                                                 | alpha-amino acid biosynthetic process                                                                 | 4.1                   | 0.00059        |
| 32787                                                   | monocarboxylic acid metabolic process                                                                 | 6.1                   | 0.00232        |
| 33559                                                   | unsaturated fatty acid metabolic process                                                              | 1.4                   | 0.00393        |
| 6636                                                    | unsaturated fatty acid biosynthetic process                                                           | 1.4                   | 0.00393        |
| 6631                                                    | fatty acid metabolic process                                                                          | 4.1                   | 0.00903        |

Sirtuin at transition of exponential to stationary growth

|                           |                                                                                                       |      |          |
|---------------------------|-------------------------------------------------------------------------------------------------------|------|----------|
| <i>Molecular function</i> |                                                                                                       |      |          |
| 16491                     | oxidoreductase activity                                                                               | 23.8 | 1.49E-09 |
| 48037                     | cofactor binding                                                                                      | 10.5 | 3.67E-05 |
| 16705                     | oxidoreductase activity, acting on paired donors, with incorporation or reduction of molecular oxygen | 6.1  | 0.00037  |
| 15113                     | nitrite transmembrane transporter activity                                                            | 1.0  | 0.00402  |
| 15513                     | nitrite uptake transmembrane transporter activity                                                     | 1.0  | 0.00402  |
| <i>Cellular component</i> |                                                                                                       |      |          |
| 5886                      | plasma membrane                                                                                       | 7.5  | 0.00329  |
| 45277                     | respiratory chain complex IV                                                                          | 1.4  | 0.00696  |
| 5751                      | mitochondrial respiratory chain complex IV                                                            | 1.4  | 0.00696  |
| 71944                     | cell periphery                                                                                        | 9.5  | 0.00897  |

Supplementary Table S6 (continued)

**Supplementary Table S9** Up-regulated genes in the stationary growth phase SirEA.

| Gene ID                          | Name        | Putative products                            | SirEΔ/WT*               | 24/48 h†                | Carbon starvation‡      |
|----------------------------------|-------------|----------------------------------------------|-------------------------|-------------------------|-------------------------|
|                                  |             |                                              | <i>log<sub>2</sub>R</i> | <i>log<sub>2</sub>R</i> | <i>log<sub>2</sub>R</i> |
| <i>Glycolytic metabolisms</i>    |             |                                              |                         |                         |                         |
| AN2286§                          | <i>alcC</i> | Alcohol dehydrogenase III                    | 8.19                    | 6.06                    | -1.62                   |
| AN4888§                          | <i>pdhA</i> | Pyruvate decarboxylase                       | 6.03                    | 6.26                    | -4.69                   |
| AN3223                           | <i>pfkA</i> | 6-Phosphofructokinase                        | 3.78                    | 3.09                    | 0.2                     |
| AN8041                           | <i>gpdA</i> | Glyceraldehyde-3-phosphate dehydrogenase     | 2.94                    | 0.86                    | -3.05                   |
| AN5210§                          | <i>pkiA</i> | Pyruvate kinase                              | 2.88                    | 2.38                    | -1.14                   |
| AN5746§                          | <i>acuN</i> | Phosphopyruvate hydratase                    | 2.36                    | 1.23                    | -1.95                   |
| AN1246§                          | <i>pgkA</i> | Phosphoglycerate kinase                      | 2.2                     | 2.44                    | -2.84                   |
| AN4591                           |             | Phosphopentomutase                           | 1.4                     | -0.63                   | -0.81                   |
| AN6900§                          | <i>tpiA</i> | Triose-phosphate isomerase                   | 1.38                    | 1.64                    | -1.3                    |
| <i>TCA cycle metabolisms</i>     |             |                                              |                         |                         |                         |
| AN5447§                          |             | Glutamate decarboxylase                      | 5.79                    | 6.1                     | -4.12                   |
| AN4376§                          | <i>gdhA</i> | NADP-linked glutamate dehydrogenase          | 5.24                    | 4.17                    | -1.34                   |
| AN2436§                          |             | ATP citrate synthase                         | 3.08                    | 1.4                     | -1.99                   |
| AN2435§                          | <i>aclB</i> | ATP citrate synthase                         | 2.86                    | 1.64                    | -1.69                   |
| AN8275§                          | <i>aclA</i> | Mitochondrial citrate synthase               | 2.37                    | 2.18                    | -3.54                   |
| AN6717                           | <i>citA</i> | Mitochondrial malate dehydrogenase           | 1.82                    | 2.23                    | -0.16                   |
| AN5790§                          | <i>mdhA</i> | Isocitrate dehydrogenase (NAD <sup>+</sup> ) | 1.6                     | 1.69                    | -1.11                   |
| AN1003                           |             | Isocitrate dehydrogenase (NAD <sup>+</sup> ) | 1.53                    | 2.23                    | -0.82                   |
| <i>Pentose phosphate pathway</i> |             |                                              |                         |                         |                         |
| AN3954§                          |             | Phosphogluconate dehydrogenase               | 2.66                    | 1.53                    | -2.23                   |
| AN0240                           | <i>pppA</i> | Transaldolase                                | 2.42                    | 1.39                    | -0.65                   |
| AN0688                           |             | Transketolase                                | 1.98                    | 1.96                    | 0.61                    |
| AN2981§                          | <i>gsdA</i> | Glucose 6-phosphate 1-dehydrogenase          | 1.58                    | 1.86                    | -2.37                   |
| <i>Nitrate assimilation</i>      |             |                                              |                         |                         |                         |
| AN1006§                          | <i>niaD</i> | Nitrate reductase (NADPH)                    | 9.34                    | 10.56                   | -4.21                   |
| AN1007§                          | <i>niiA</i> | Nitrite reductase                            | 8.41                    | 5.92                    | -4.33                   |
| AN1008§                          | <i>crnA</i> | Nitrate transporter                          | 7.33                    | 7.49                    | -2.09                   |
| AN0399                           | <i>nrtB</i> | High-affinity nitrate transporter            | 6.59                    | 6.41                    | 0.06                    |
| <i>Cell wall synthesis</i>       |             |                                              |                         |                         |                         |
| AN3307§                          | <i>agsB</i> | α-1,3-Glucan synthase                        | 7.82                    | 5.36                    | -4.35                   |
| AN4367                           | <i>chsF</i> | Chitin synthase III                          | 5.21                    | 0.96                    | -3.09                   |
| AN4515                           | <i>crhB</i> | Transglycosidase                             | 2.9                     | 2.18                    | -0.61                   |
| AN6697                           | <i>sunA</i> | SUN-family protein                           | 2.88                    | 0.52                    | -1.21                   |
| AN0726                           | <i>sunB</i> | SUN-family protein                           | 2.78                    | 1.54                    | 3.15                    |
| AN7511§                          | <i>gelE</i> | β-1,3-Transglycosidase                       | 2.45                    | 5.51                    | -3.74                   |
| AN10709                          | <i>gfaA</i> | Glutamine fructose-6-phosphate transaminase  | 1.46                    | -0.01                   | 0.96                    |

Determined using \*DNA microarrays, †mRNA sequencing and ‡according to Szilágyi *et al.* §Overlap among genes up-regulated by SirE, stationary-phase and carbon starvation. ID, identity.



**FIGURE S1**

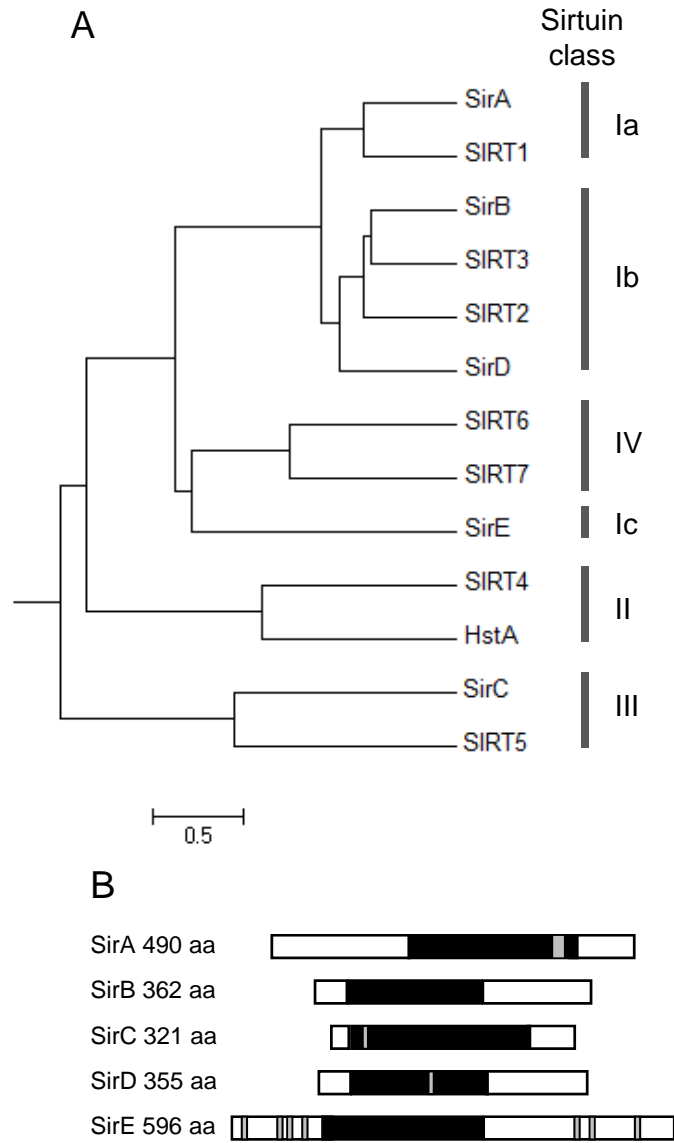

FIGURE S1

Sirtuin at transition of exponential to stationary growth

C

```

1      10      20      30      40      50      60      70      80
ScSir2p MTIPHMKYAVSKTSENKVSNTVSPQTQDKDAIRKQPDDIINNDEPSHKKIKVAQPDLSRENTTDDPLGHTKAALGEVASME
SirA     .....MDLASAPRGESFP LKAP.....LVEIEAAEVERSLPQENAAPEEKGSNSQSEYESDS
SirB     .....
SirC     .....
SirD     .....
SirE     .....MAPRKTTPATKPAKPTPASTATTS
HstA     .....

90      100     110     120     130     140     150     160
ScSir2p LKPTNDMDPLAVSAASVVSMSNDVLPKPTPKGPIIISKNPSNGIFYGPSFTKRESLNARMFLKYYGAHKFLDITYLPEDLN
SirA     DALDDEWETQSLYEDAIQMIRDDQLRDGTIPG.....ACTLEEAIEFRKRLHEVGAQVFEETIARDT.
SirB     .....
SirC     .....
SirD     .....
SirE     SCSPSPKSFPIPMVDDFSFSDSELSDAQSLIEP.....
HstA     .....

170     180     190     200     210     220     230     240
ScSir2p SLYIIYLIKLLGFVVKDQALIGTINSIVHINSQERVQDLGSAISVTNVEDPLAKKQTVRLIKDLQRAINVLCTRRLRLSN
SirA     .....VTAKKLCTAFG.....ILPPSFLEGAPDEAYHPLLAIAISREFARRQKLPQ
SirB     .....MGNESSTLVDEKTPPSVLE
SirC     .....MV
SirD     .....MSSLRAHQKKNPTPTQOCN
SirE     .....EGFSLLSPDESSGGRSQDELPPARKKRRVAGPKERRTQHLDLTPRLGFSD
HstA     .....MISEVFGALPVIILSAKHVYCYCSMTAPAIRIPFTGPLPPP IIVPASASSVSGAIDAFNLFL

250     260     270     280     290     300     310
ScSir2p FFTIDHFIQKHTA...RKILVLTGAGVSTSLGTFDFRS.SEGFYSKIKHLGLDDPQDVFNYNIFMHDPSVFYNTANMV
SirA     YNSVDDAVKLLKES...KNIIVLTGAGISTSLGTFDFRSKDTGLYSKLENLGLNDPQEVFDIRIFREDPGIFYSLAKDI
SirB     ARTVEAVAKYVKEKPV...RRVVMVGCAGISTAACDFDFRSPDTGIYANLVHLDLPDPEAVFDISFFRONPKPFYALAREL
SirC     SNDIKSFQEYLLKGS...KRIMALLGAGISTASSGLTFFRG.AGGLRWSYDATELATPEAFEAN...PDLVWQFYSYRRH
SirD     QTTLDSICKDIQTGKI...TRIVALVGCAGISTSSGLADDFRTPDTGLYAKLEPLQLPYPEALFHISYFKHTPEPFYALARGR
SirE     YGDQEPQLNLLVNTIRNHKKIVVIAGAGISTSAGTFDFRS.DDGLFKTLQKKHNLKASGKLMFDDAAVYQDEALTAQSFQEM
HstA     TAPPSPYLRLGVDVGRN...SQTVLLTGAGISTVASGLDYRGE.ENGTYVTKNKYR...PIYFHEFATRHESEKRYWALRSFIG

320     330     340     350     360     370
ScSir2p LP.....PEKITYSPLHSFTKMLQMKGKLLRNYTONIDNLESYAG.....ISTDKLVQCHGSFATATCVTCHWN
SirA     LP.....TEKKFSPTHGFIIRLLQDKGKLLTNYTONIDNLEANAG.....VFPENIVQCHGSFATATCVKCOYK
SirB     AP.....GOYRPTLAHSFVKLLYDKGKLLKHFTONIDCLEANAG.....VPGDMIIEAHGSFATQRCIECKTA
SirC     MA.....LKAKPNKAHYALAEARRKREFITLSONVDGLSQORAN.....HPPEQLHLLHGNLFTVCKCTSFYCK
SirD     HP.....WNTKPGVGHAFALALLKKGVLGFVFTONIDGLELDAG.....VSRERVMNLLHGDWSDQHCICRCS
SirE     VRSLSEEAEEKSPTAFHMLARLGS DNRLRLYTONIDGLETSMPLATQIPLNVKAPWPRTIQHGSLEKMCQKCRHM
HstA     WPGGL...LKAKPNSTHWAIRDLGKGYVSSVITONVDSFHSIA.....HPEIPSIIEHGYLRSVVCLSCRNQ

380     390     400     410     420     430     440
ScSir2p LPGE.RIFNKIRNLELPLCPYCYKRRRE..YFPEGYNKVGVAASQ.....GSMSEPPYILNSYGLKPDITFFGEA
SirA     VAGD.EIYDDIKKGLIPECAQCRKRIAEDSQKPGQKRRKNSTSAHKDRSKSGEDSSDGEDYEIPTPGVMKPDITFFGED
SirB     YPDD.LMKEAIAKGEVPCN.....KNIPEPRPFTDDKSGEK
SirC     YVRE.NDFTDPIVPAALAI.....QANCEGIVKPAIVMFGES
SirD     YPAD.RMRKALITGEVPEPCV.....GQRSHGIGKMRPRIVLYNEH
SirE     STFDRVMFDRPDAPCEPECVLTNQFRMET.....ALDTONPEEQRRRGLKLNPDG
HstA     FPRS.EFQKSLERLNP SWAEFLARMVDIG.....ALDTONPEEQRRRGLKLNPDG

450     460     470     480     490     500     510
ScSir2p L..P[N]KF.HKSIRE DILECDLLTICIGTSLK[V]APVSE[IVN].MVP SHVP...QVLINRD...P[V]KHAE.FDLSL[GL]YCD[DD]
SirA     L..PDEFGRLLHDDRDKVDLVIVIGTSLK[V]APVAV[VP]G.VLPPHIP...QIYISRT...PVAHTN.FDIDL[GL]GDCDV
SirB     L..PSAFFDN.RTLPET.ADLCTVMGTSLS[V]QPFASLPS.FVADGVP...RVLINRERVGG[GL]SRP.DDVLILDDCDN
SirC     A..SESLASALKQQKPENEEEAELDISARIPLNFVSR.DALPRCP...ECKEGLLRPGVVMFGESLPVQTLDLVDN
SirD     L..PEGFDSREEEMLST.ADLLLVIGTSLK[V]APCSE[IPR].RLPSHVP...RVLVNRELVGNITGIRE.SDVCL[GL]GDCDA
SirE     NPDEA[IT]SVMNADIRSRPDALIVVGTSLK[V]IPGVRRLVKS[L]CSVIRSRNGV[TM]WINNEPPSGKEFEDCFDLLV[GL]GDCDE
HstA     D..VELPEAPYSTFRYPCSTCLEKPPRLADGTPARMEVERKDGAWL...TSEAGILKPAVIMFGENIEPPV[GL]LAEE

520     530     540     550     560
ScSir2p IAAMVAQKCGWTIPK.K.WNDLKNKNFKCQEKDKGVYVVTSD EHPKTL.....
SirA     VVSELRRRAGWELKHEM.I SPDEKVDVTPVFGYGRHVFVSG.....
SirB     GVRKLARALGWEDELER.LWEEANPNQK...SREEELATPRTREERLENEISRL.....TAEIDKTLKISDAY
SirC     WMNEGRLDMLVIGTSRVVWPAAGYAEQARAKGARVAVVNDPNDMGKGTFS.....KDWFFQG.....
SirD     WLRVARHLGWDEELES.VWKDTLVRKEKSSRDKGWDDKAESPTLEECIVRA.....AEQMKVRMVGSEGH
SirE     VAR.LAQKLRWDDSKPIFDEQCSADV ERVKNEQGPLSVVITTPKKEKVAQTGMLTPSSSYDGDVENASTTTLSNPASK
HstA     AIDDAERLLVLGTSLAT..YSAWRLVERAYKRGMPGIINIGGVRNESVLLKE.....ADKGSDFLARYTRC

ScSir2p .....
SirA     .....
SirB     QKRVRERLEGEPLSSPESNGTGLAHVFP HLARR.....
SirC     .....DAGVIVPEILKSVTGEV.....
SirD     RR...MLEG.....HLGEKMAEIMAKRGQ.....
SirE     GRKLTEILKASKKDAPKTESAGVKKPAPRKRTKKEPVKNAKITTF SKVTKAQKVTPEEKSVKLEEHKAMHPLPPGAARTN
HstA     S.....LHSDAILPSVASQLPSLSR.....

ScSir2p .....
SirA     .....
SirB     .....
SirC     .....
SirD     .....
SirE     APMLPGLAKDDSKSTPSGKRGQLETISPDRIPKGMGKLLD
HstA     .....

```

FIGURE S2

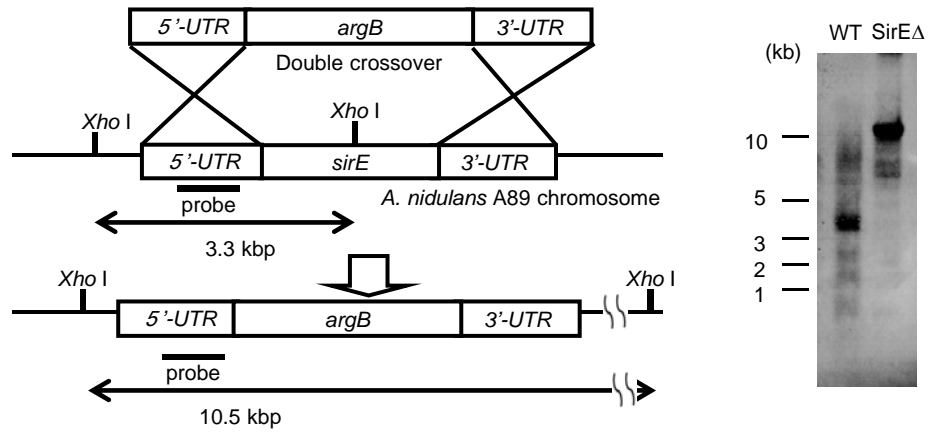

FIGURE S3

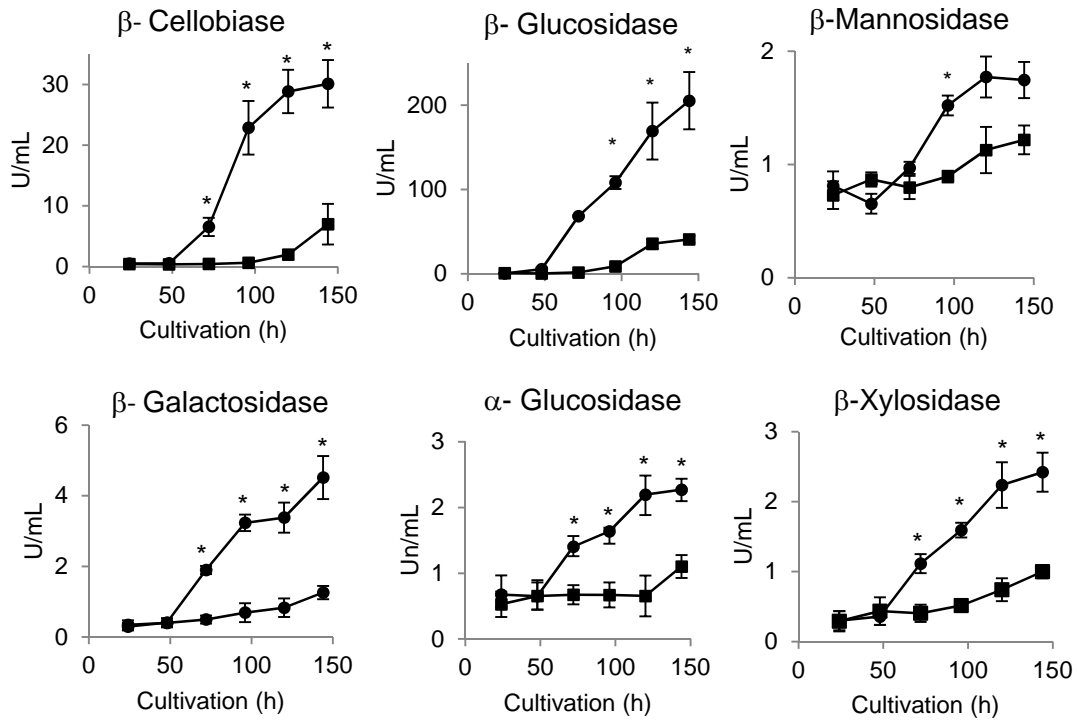

**FIGURE S4**

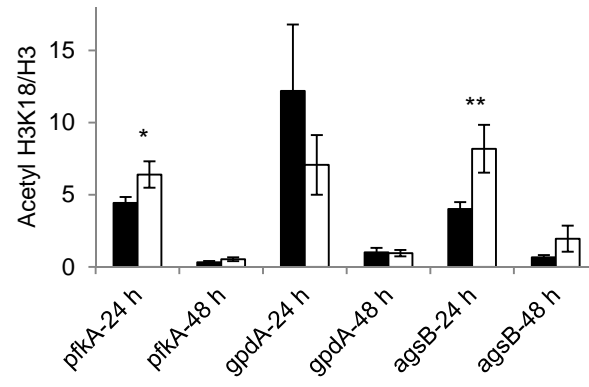

Supplement: 10.1074_M116.753772_jbc.M116.753772-1.pdf [file 10.1074_M116.753772_jbc.M116.753772-1.pdf]
